# Supplementary material for: Microwave-assisted synthesis of nitrogen-doped carbon dots using prickly pear as the carbon source and its application as a highly selective sensor for Cr(vi) and as a patterning agent
Source: Royal Society of Chemistry journal article supplement (doi:10.1039/d1ay01274f), 2021-12-10
Supplement: d1ay01274f1.pdf [file d1ay01274f1.pdf]

## Supplementary Materials

### Microwave-assisted synthesis of nitrogen doped carbon dots using prickly pear as the carbon source and its application as highly selective sensor for Cr(VI) and as patterning agent

Shreya Bhatt<sup>a,b</sup>, Gaurav Vyas<sup>a,b</sup> and Parimal Paul<sup>a,b,\*</sup>

<sup>a</sup>Analytical and Environmental Science Division & Centralized Instrument Facility, CSIR-Central Salt and Marine Chemicals Research Institute, G. B. Marg, Bhavnagar 364002, India.

<sup>b</sup>Academy of Scientific and Innovative Research (AcSIR), Ghaziabad- 201002, India.

\* Corresponding author: [ppaul@csmcri.res.in](mailto:ppaul@csmcri.res.in).

#### List of Supplementary Materials

| Figure/<br>Table No. | Figure/Table caption                                                                                                                                                                                                    | Page<br>No. |
|----------------------|-------------------------------------------------------------------------------------------------------------------------------------------------------------------------------------------------------------------------|-------------|
| Table S1             | Quantum yield calculation of N-CDs.                                                                                                                                                                                     | 2           |
| Table S2             | Fluorescence lifetime data with bi-exponential fit of the fluorescence decay curves of N-CDs and NCDs+Cr(VI).                                                                                                           | 3           |
| Table S3             | Different parameters for analysis of real sample using Stern-Volmer equation.                                                                                                                                           | 4           |
| Fig. S1              | Raman spectrum of N-CDs.                                                                                                                                                                                                | 5           |
| Fig. S2              | Fluorescence decay curve of N-CDs recorded at 360 nm excitation.                                                                                                                                                        | 6           |
| Fig. S3              | Bar diagram showing change in fluorescence intensity of N-CDs at different pH ranging from 2 to 12. ( $\lambda_{\text{ex}} = 360 \text{ nm}$ , $\lambda_{\text{emi}} = 450 \text{ nm}$ ). (Red marking with metal ion). | 7           |
| Fig. S4              | Fluorescence spectra of N-CDs with 0.5 to 5.0 % of NaCl is shown. The intensity of the fluorescence band as a function of concentration of NaCl is shown in the inset.                                                  | 8           |
| Fig. S5              | Plot of the change in fluorescence intensity of N-CDs in presence of different concentrations of Cr(VI) as a function of time (0 to 60 min).                                                                            | 9           |
| Fig. S6              | Fluorescence spectral change of N-CDs in presence of various metal ions ( $\lambda_{\text{ex}} = 360 \text{ nm}$ ).                                                                                                     | 10          |
| Fig. S7              | Fluorescence decay curve of N-CDs in presence of Cr(VI).                                                                                                                                                                | 11          |

**Table S1.** Quantum yield calculation of N-CDs.

| Sample name      | Integrated emission intensity (I) | Absorbance (A) at 360 nm | Refractive index of solvent ( $\eta$ ) | Quantum yield (Q) at 360 nm |
|------------------|-----------------------------------|--------------------------|----------------------------------------|-----------------------------|
| Quinine sulphate | 542308                            | 0.132                    | 1.33                                   | 0.54 (known standard value) |
| N-CDs            | 80758                             | 0.0752                   | 1.33                                   | 0.148                       |

**Table S2.** Fluorescence lifetime data with bi-exponential fit of the fluorescence decay curves of N-CDs and NCDs+Cr(VI).

| Sample         | $\tau_1/\text{ns}$ (%) | $\tau_2/\text{ns}$ (%) | $\tau_{\text{ave}}/\text{ns}$ |
|----------------|------------------------|------------------------|-------------------------------|
| N-CDs          | 1.46 (47)              | 8.10 (53)              | 4.979                         |
| N-CDs + Cr(VI) | 1.40 (44)              | 7.56 (56)              | 4.849                         |

**Table S3.** Different parameters for analysis of real sample using Stern-Volmer equation.

| Sample No. | Spiked ( $\mu\text{M}$ ) | Intensity (I <sub>0</sub> )(a.u) | Intensity of Sample (I) (a.u) | I <sub>0</sub> /I (a.u) | Calculated Concentration ( $\mu\text{M}$ ) |
|------------|--------------------------|----------------------------------|-------------------------------|-------------------------|--------------------------------------------|
| DW-1       | 15                       | 3.9745                           | 2.89                          | 1.373                   | 15.1                                       |
| DW-2       | 30                       | 3.9745                           | 2.23                          | 1.786                   | 31.8                                       |
| TW-1       | 25                       | 3.9745                           | 2.45                          | 1.625                   | 25.8                                       |
| TW-2       | 35                       | 3.9745                           | 2.05                          | 1.936                   | 37.8                                       |

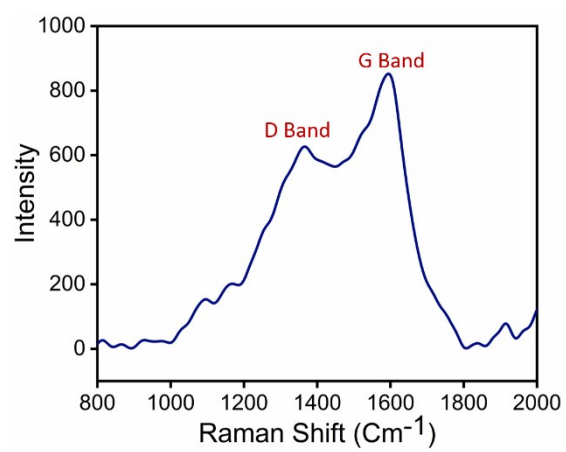

**Fig. S1.** Raman spectrum of N-CDs.

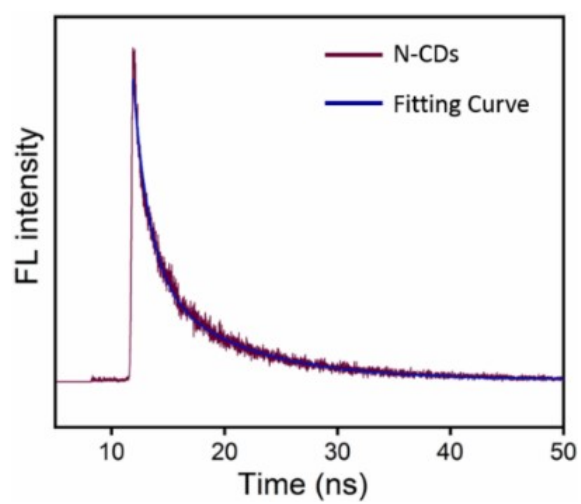

**Fig. S2.** Fluorescence decay curve of N-CDs recorded at 360 nm excitation.

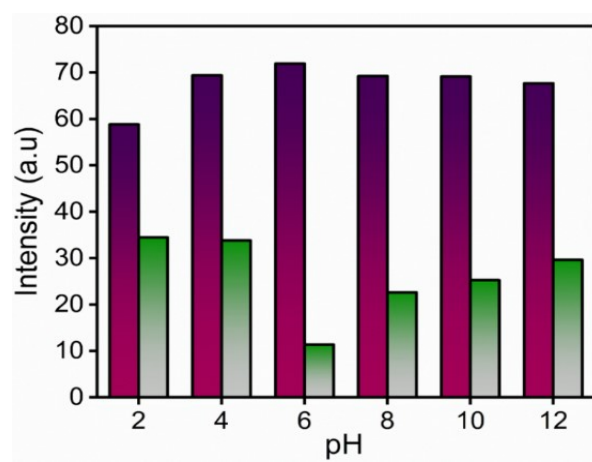

**Fig. S3.** Bar diagram showing change in fluorescence intensity of N-CDs at different pH ranging from 2 to 12. ( $\lambda_{ex} = 360 \text{ nm}$ ,  $\lambda_{emi} = 450 \text{ nm}$ ). (Red marking with metal ion).

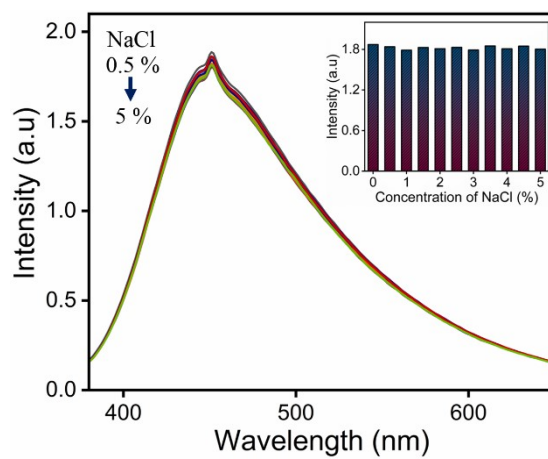

**Fig. S4.** Fluorescence spectra of N-CDs with 0.5 to 5.0 % of NaCl is shown. The intensity of the fluorescence band as a function of concentration of NaCl is shown in the inset.



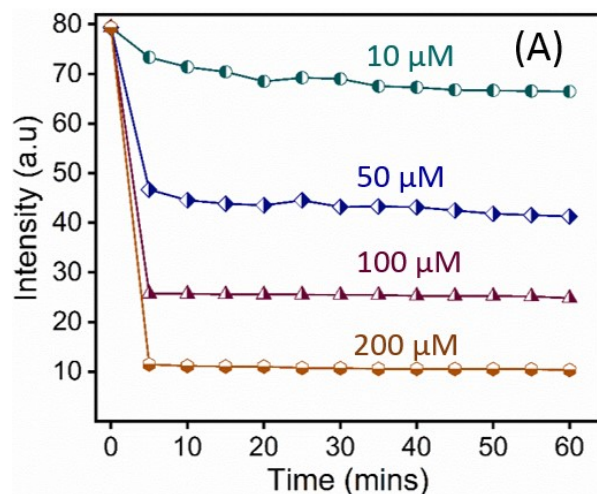

**Fig. S5.** Plot of the change in fluorescence intensity of N-CDs in presence of different concentrations of Cr(VI) as a function of time (0 to 60 min).

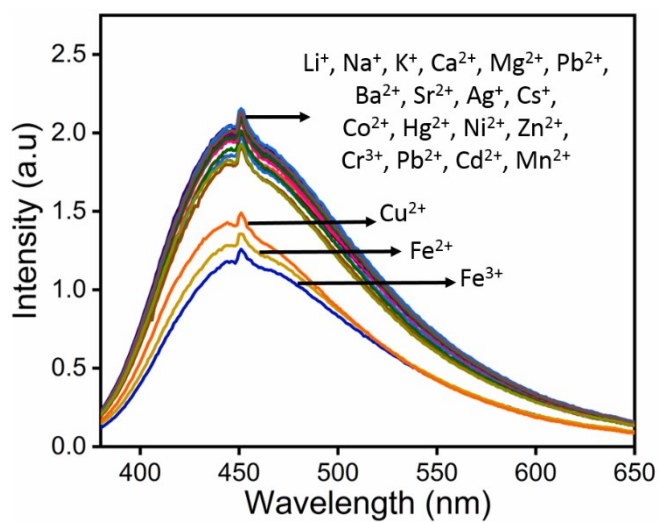

**Fig. S6.** Fluorescence spectral change of N-CDs in presence of various metal ions ( $\lambda_{\text{ex}} = 360$  nm).

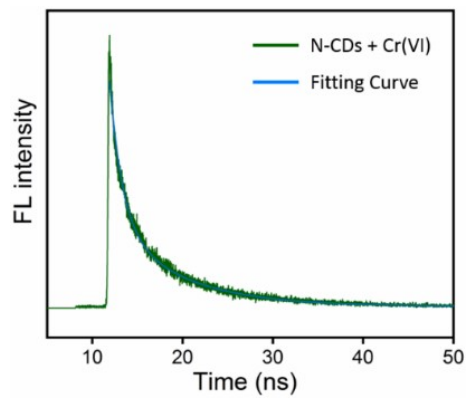

**Fig. S7.** Fluorescence decay curve of N-CDs in presence of Cr(VI).
